# Supplementary material for: Printed sustainable elastomeric conductor for soft electronics
Source: PubMed Central journal article supplement (PMC10628110; doi:10.1038/s41467-023-42838-7), 2023-11-06
Supplement: 41467_2023_42838_MOESM1_ESM.pdf [file 41467_2023_42838_MOESM1_ESM.pdf]

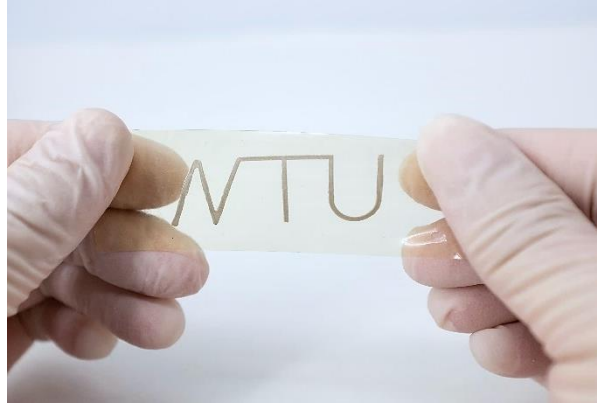

21

22 **Supplementary Fig. 1 | The photo image of one printed VegPU/Ag pattern on the VegPU**  
23 **substrate.** The VegPU/Ag ink was screen-printed on a VegPU thin film and then cured by  
24 sintering solution.

25

26

27

28

29

30

31

32

33

34

35

36

37

38

39

40

41

42

43

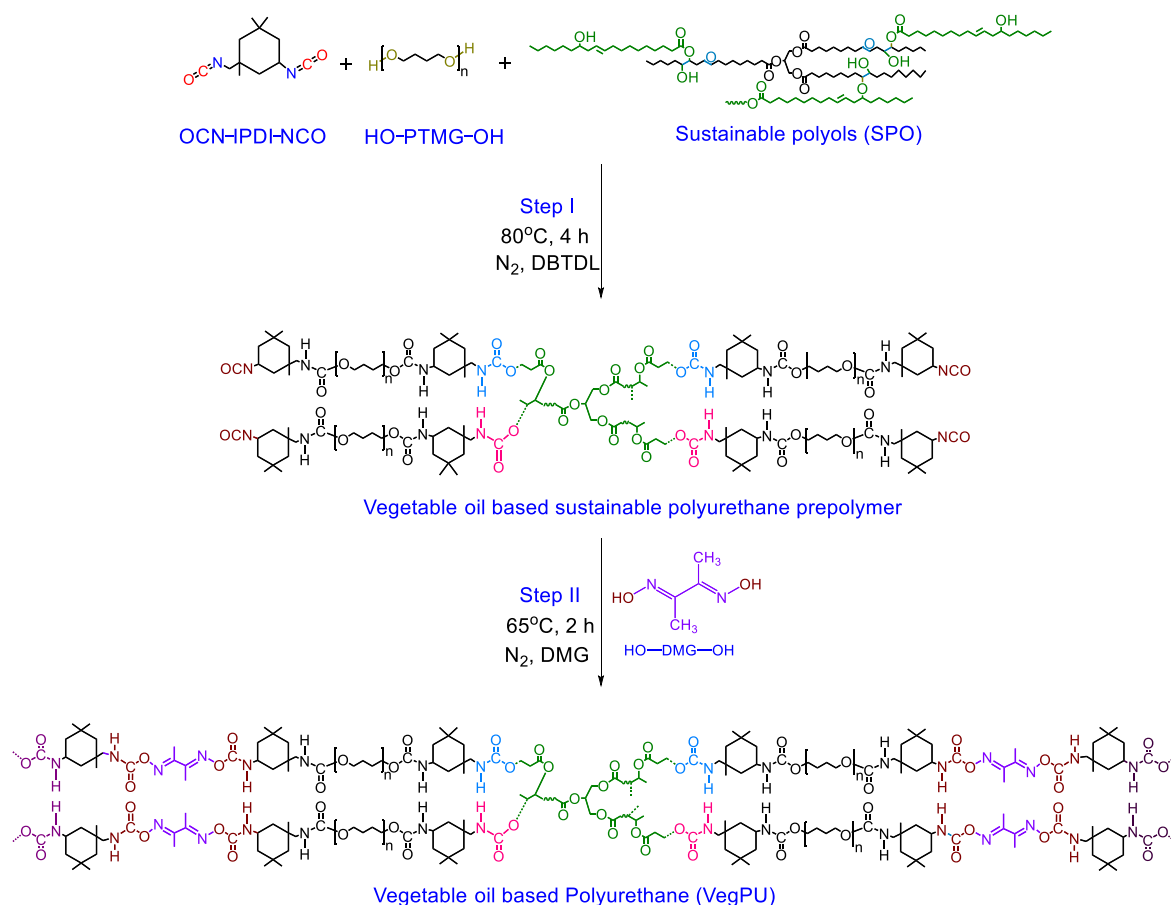

44

45 **Supplementary Fig. 2 | Synthesis of representative VegPU from sustainable polyols.** A series  
 46 of VegPU were synthesized from SPO and PTMG with IPDI at a molar ratio of 0.8:0.5:1.5 (-OH/  
 47 NCO). First, the PTMG-IPDI-based NCO-terminated precursor was prepared by the PTMEG and  
 48 IPDI chemical reaction with a 2: 3 mole ratio at 75 -80 °C under a nitrogen condition for 6 hours.  
 49 The PTMEG-IPDI precursor (4 mmol) and SPO (8.03 mmol) were solubilized in anhydrous DMF  
 50 (20 ml) and were left to react for 4 hours at 80 °C. The reacting solution was then given one drop  
 51 of DBTDL and stirred for another 30 minutes. Subsequently, dimethylglyoxime (DMG) (4.04  
 52 mmol) as a chain extender was diluted in DMF (5mL), and the resulting solution was added into  
 53 the reaction system that was further maintained at 65 °C for 2 hours. The resultant polymer solution  
 54 was then placed into a glass mold (length × width: 100 mm × 50 mm) and dried in an 80 °C oven  
 55 for 12 hours.

56

57

58

59

60

61

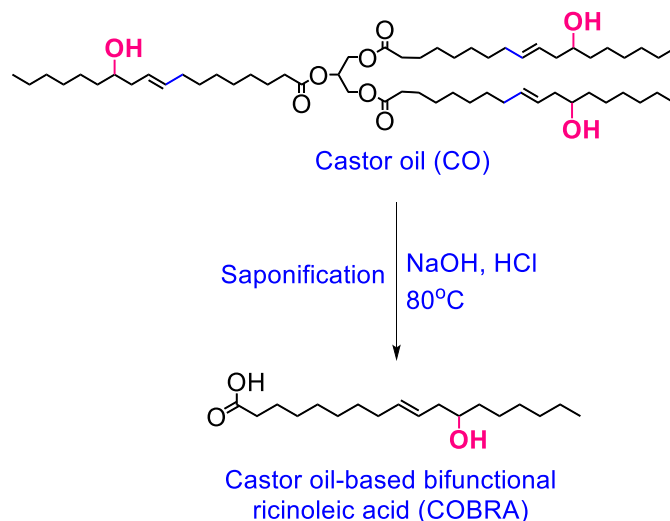

62

63 **Supplementary Fig. 3 | Synthesis of castor oil-based bifunctional ricinoleic acid.** Bifunctional

64 ricinoleic acid could be acquired through either saponification or fractional distillation of castor

65 oil that has been hydrogenated. Initially, required quantities of castor oil were saponified into

66 bifunctional ricinoleic acid by heating a sodium hydroxide (NaOH) mixture at 80-85 °C for 4 hours.

67 The COBRA solution was then neutralized using diluted hydrochloric acid (HCl). The organic

68 phase has been filtered after neutralization by washing with double-distilled water (*ddH<sub>2</sub>O*). The

69 dissolution-decantation process was routine four times, and the product was dried over magnesium

70 sulfate (MgSO<sub>4</sub>). The majority of the bifunctional fatty acids in castor oil are ricinoleic acid (88 to

71 91%), and additional acids are present, including linolenic, linoleic, and oleic acids.

72

73

74

75

76

77

78

79

80

81

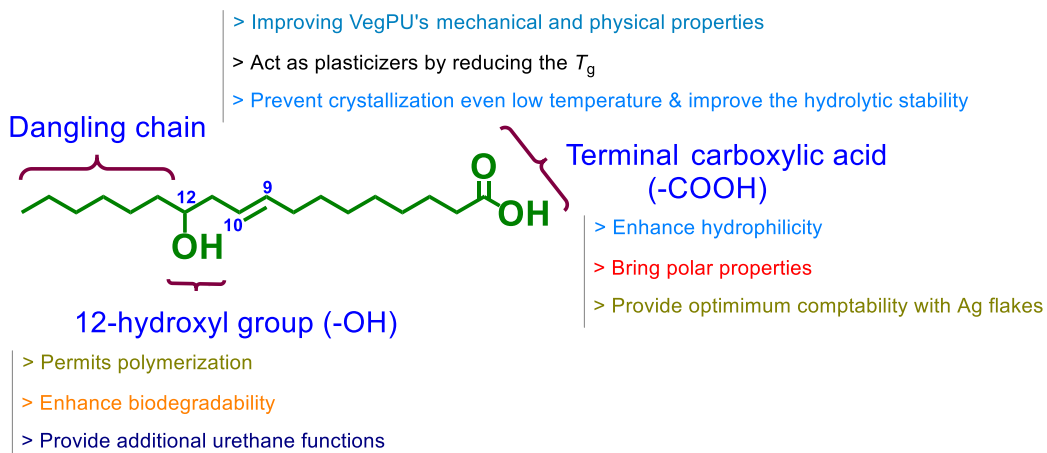

82

83 **Supplementary Fig. 4 | The importance and advantages of bifunctional ricinoleic acid**  
 84 **functional units** of dangling chain, -COOH and -OH in the VegPU preparations. Ricinoleic acid  
 85 (12 hydroxy-cis-9-octadecenoic acid) is the major hydroxylated aliphatic unsaturated fatty acid  
 86 in castor oil (>90%) and a key substrate for the polymerization of precursors to produce sustainable  
 87 VegPU.

88

89

90

91

92

93

94

95

96

97

98

99

100

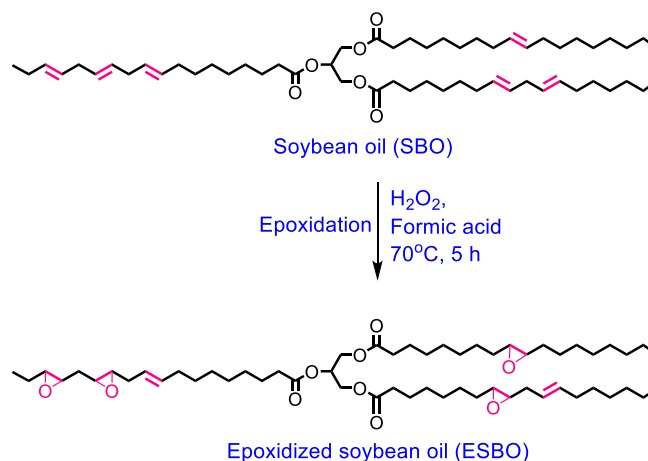

101  
102 **Supplementary Fig. 5 | Synthesis of epoxidized SBOs.** In a typical experiment, a measured  
103 quantity of soybean oil (0.5038 mol) was processed at  $70^\circ\text{C}$  for 1 hour in a 250 mL round-bottle  
104 flask with a thermometer, and an oil bath. Thereafter, a mixture of hydrogen peroxide ( $\text{H}_2\text{O}_2$ ,  
105 0.2855 mol) and formic acid ( $\text{HCOOH}$ , 0.0570 mol) was introduced to the soybean oil with the  
106 catalyst at a syringe pump rate of  $0.20\text{ cm}^3\text{ min}^{-1}$ . The resultant mixture was stirred periodically  
107 and kept at the same temperature of  $70^\circ\text{C}$  for 5 hours. After the addition of the oxidant mixture,  
108 the reaction proceeded for the preferred duration of time.

109  
110  
111  
112  
113  
114  
115  
116  
117  
118  
119  
120  
121

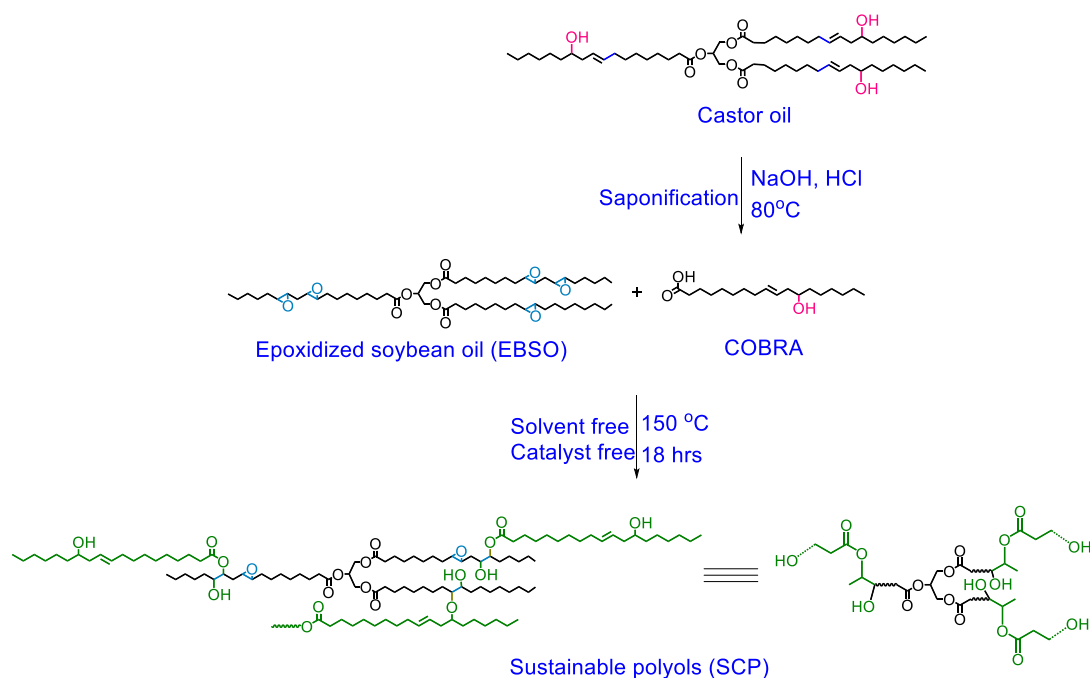

122

123 **Supplementary Fig. 6 | Synthesis of sustainable polyols.** Firstly, COBRA was placed in a flask

124 with a mole ratio of the carboxyl group of 1.5, stirred with a mechanical stirrer, and kept at 150 °C

125 in an N<sub>2</sub>-free environment. Then, ESBO at a mole ratio of 3 to the epoxy group was added drop

126 by drop while vigorously stirring. After being mixed fully, the mixture was kept at 140 to 180 °C

127 overnight with the constant stirring condition. To quench the reaction, 30% ammonia in water was

128 added to the solution mixture. After the reaction was complete, the finished SPO products were

129 obtained with Et<sub>2</sub>O and washed at least five times with double-distilled water. After drying the

130 precipitate with MgSO<sub>4</sub>, it was filtered. After removing the organic solvent with Rotavapor and

131 vacuum, the clear viscous pale yellow SPO was obtained.

132

133

134

135

136

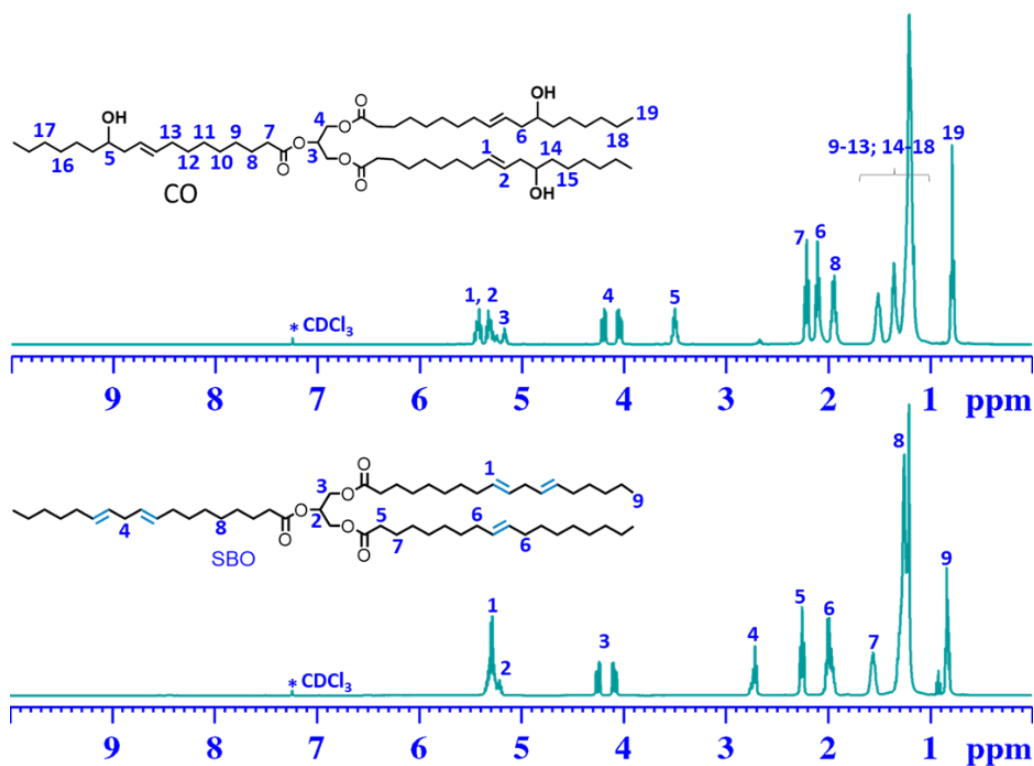

137

138 **Supplementary Fig. 7 |  $^1\text{H-NMR}$  spectra of castor oil (CO) and soybean oil (SBO).** The  $3^\circ$   
 139 proton of the  $-\text{CH}_2\text{CHCH}_2-$  the backbone of castor oil is at 5.1–5.4 ppm, the  $-\text{CH}_2$  proton of the -  
 140  $\text{CH}_2-\text{CHCH}_2-$  backbone is at 4.2–4.3 ppm, and the  $3^\circ$  hydrogen neighboring to the  $-\text{OH}$  proton in  
 141 the ricinoleic acid chain is at 3.4–3.7 ppm. The SBO spectrum demonstrates that each  
 142 triacylglycerol forms five double bonds ( $-\text{C}=\text{C}-$ ).

143

144

145

146



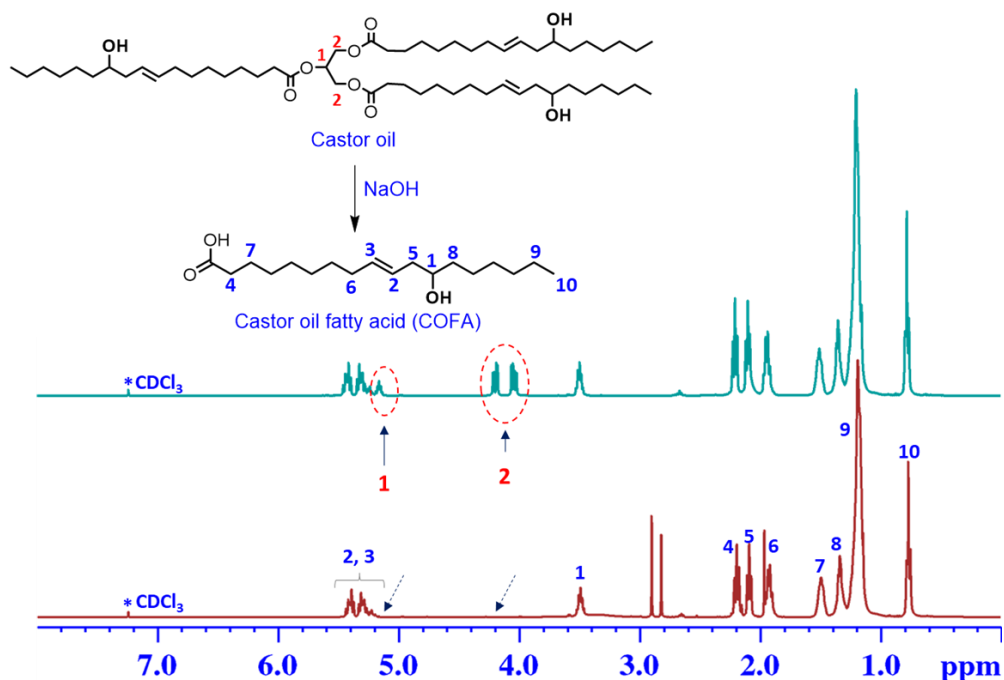

147

148 **Supplementary Fig. 8 | <sup>1</sup>H-NMR spectra of CO and COBRA.** The 3° proton of the -  
 149 CH<sub>2</sub>CHCH<sub>2</sub>- the backbone of castor oil is at 5.1–5.4 ppm, the -CH<sub>2</sub> proton of the -CH<sub>2</sub>-CHCH<sub>2</sub>-  
 150 backbone is at 4.2–4.3 ppm, and the 3° hydrogen neighboring to the -OH proton in the ricinoleic  
 151 acid chain is at 3.4–3.7 ppm. The peaks at 5.1–5.4 ppm and 4.2–4.3 ppm went away after the  
 152 reduction reaction. On the other hand, the peak intensity at 3.4–3.7 ppm went up, which shows  
 153 that triglyceride was completely broken down, which led to the formation of primary hydroxyl  
 154 groups (-OH). It is therefore concluded that COBFA was successfully prepared.

155

156

157

158

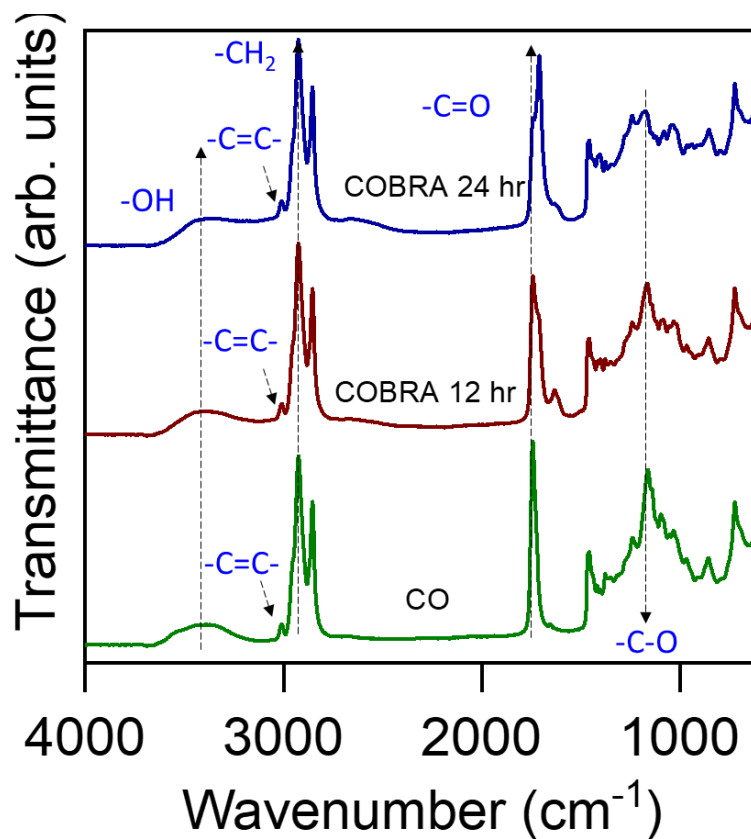

159

160 **Supplementary Fig. 9 | FTIR spectra of CO and COBRA at various reaction times.** The broad  
161 absorption band at around  $3400^{-1}$  and  $1750^{-1}$  can be assigned to hydroxyl and carbonyl groups,  
162 respectively.

163

164

165

166

167

168

169

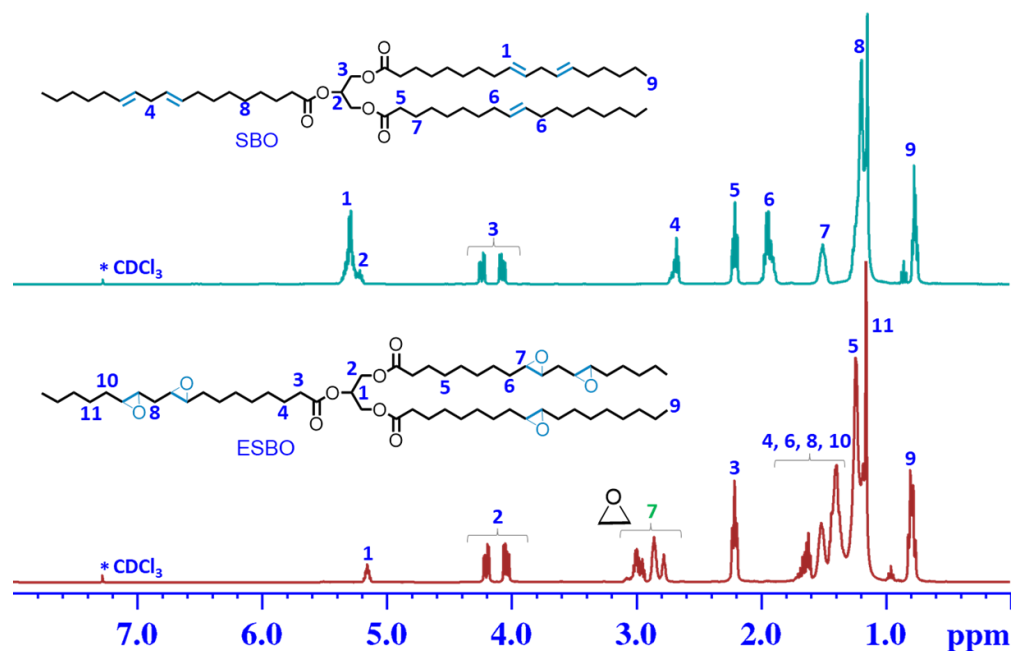

170

171 **Supplementary Fig. 10** | <sup>1</sup>H-NMR spectra of soybean oil (SBO) and epoxidized soybean oil  
 172 (ESBO). The SBO spectrum demonstrates that each triacylglycerol forms five double bonds (-  
 173 C=C-). The ESBO spectrum illustrates that unsaturated fatty acids were transformed into epoxy  
 174 groups labeled as diepoxides and monoepoxides, with signals having appeared at 3.06–3.16 ppm  
 175 (-CHOCH-CH<sub>2</sub>-CHOCH-) and 2.5–3.1 ppm (-CHOCH-CH<sub>2</sub>-CHOCH-). The peak at 1.45–1.50  
 176 ppm methylene protons (-CH<sub>2</sub>-CH<sub>2</sub>-CHOCH-) neighboring epoxy group (-CH<sub>2</sub>-CH<sub>2</sub>-CHOCH-) and at 2.3 ppm α-  
 177 methylene group (α-CH<sub>2</sub>) to acyl group (CH<sub>2</sub>-CH<sub>2</sub>-C=O-O-).

178

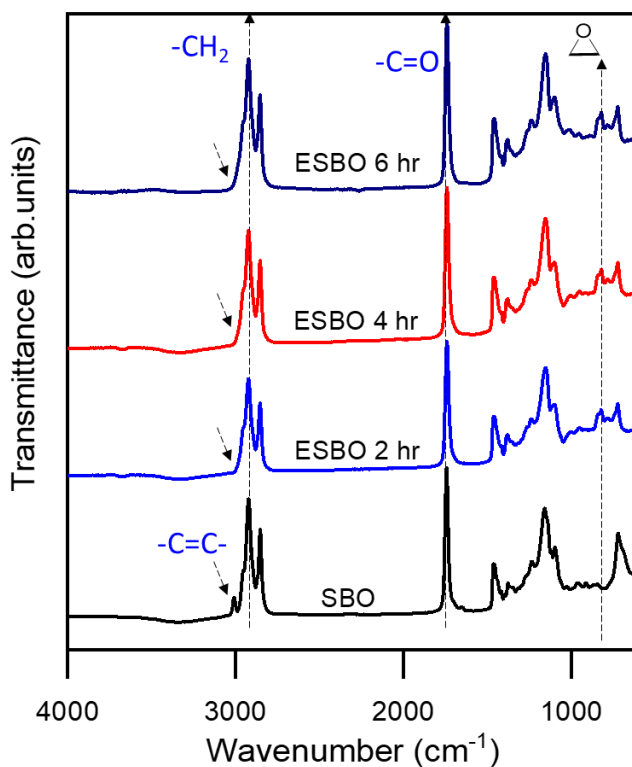

179

180 **Supplementary Fig. 11 | FTIR spectra of SBO and epoxidized SBO (ESBO) at various**  
 181 **reaction times.** The characteristic absorption bands at 822, 1173, 1725, and 2913  $\text{cm}^{-1}$  are  
 182 attributable to the stretching vibration of epoxy, C–O, C=O, and C–H groups of the ESBO,  
 183 respectively. The epoxidation of epoxidized SBOs (ESBO) was followed by the disappearance of  
 184 the C = C peak at 3011  $\text{cm}^{-1}$  and the appearance of the new broad epoxy peak stretching vibration  
 185 between 862-809  $\text{cm}^{-1}$ .

186

187

188

189 1

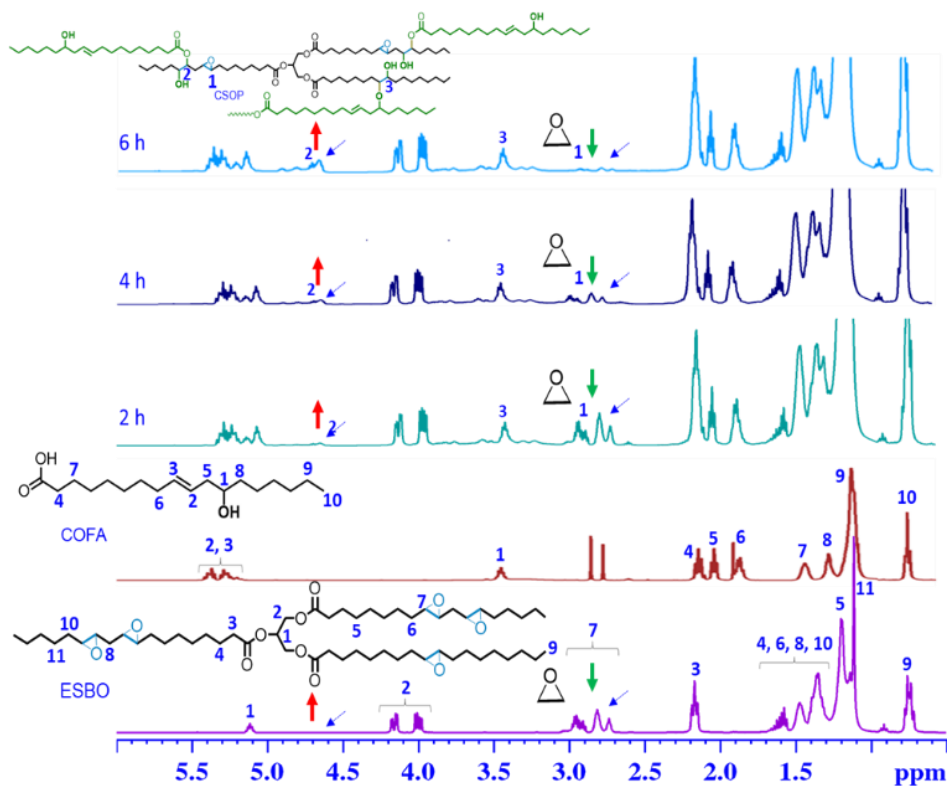

190

191 **Supplementary Fig. 12 |  $^1\text{H-NMR}$  spectra of sustainable polyols (SPO) for distinct intervals**  
 192 **of carboxyl to epoxy group reactions.** As reaction times increased, the peaks at 2.8-3.2 ppm,  
 193 representing the epoxy groups, decreased. The peaks at 2.7-3.1 ppm representing epoxy groups,  
 194 decreased as reaction times increased. On the other hand, new peaks corresponding to  $3^\circ$  to Hto  
 195 atoms next to the newly formed ester groups were detected between 4.5-4.9 ppm. The peaks  
 196 showing where hydrogen is attached to carbons near the ester overlap with those where hydrogen  
 197 is attached to carbons near the hydroxyl.

198

199

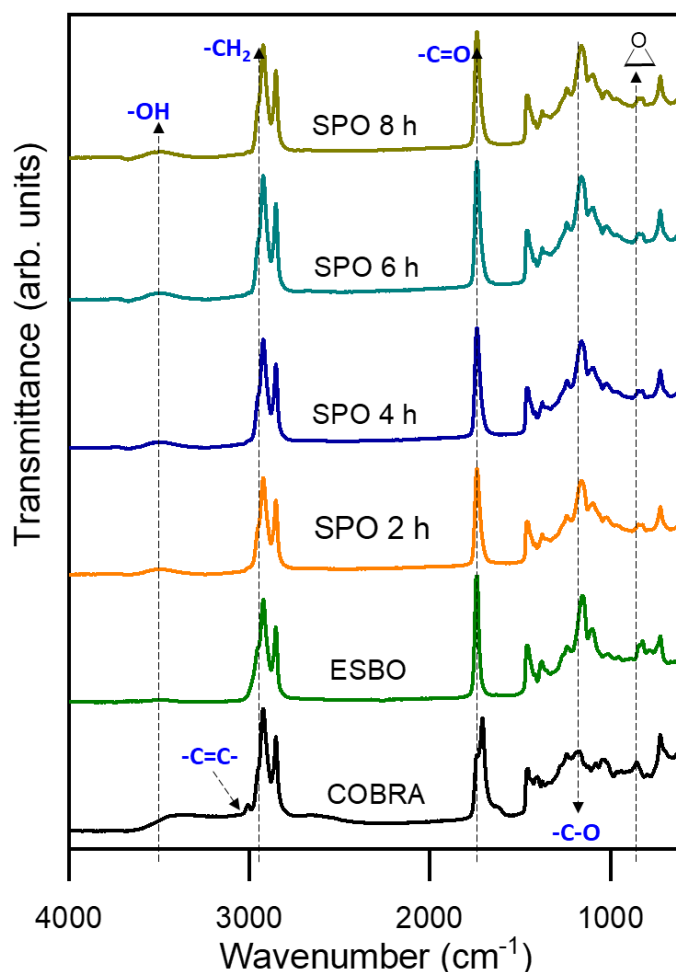

200

201 **Supplementary Fig. 13 | FTIR spectra of COBRA, ESBO, and SPO at various reaction times**  
 202 **intervals.** The oxirane absorption bands at  $822\text{ cm}^{-1}$ , which represent epoxy groups, appeared,  
 203 while the carbon-carbon ( $\text{-C=C-}$ ) double bonds at  $3001\text{-}3012\text{ cm}^{-1}$  almost vanished. The absence  
 204 of epoxy groups in polyols indicated that the epoxy groups in ESBO had been ring-opened. The  
 205 epoxy groups in epoxidized SBO decreased after the ring-opening reaction was initiated by  
 206 COBRA, while a broad peak at  $3395\text{ cm}^{-1}$  appears, indicating that the epoxy groups in ESBO were  
 207 ring-opened and sustainable hydroxyl ( $\text{-OH}$ ) polyols were successfully formed.

208

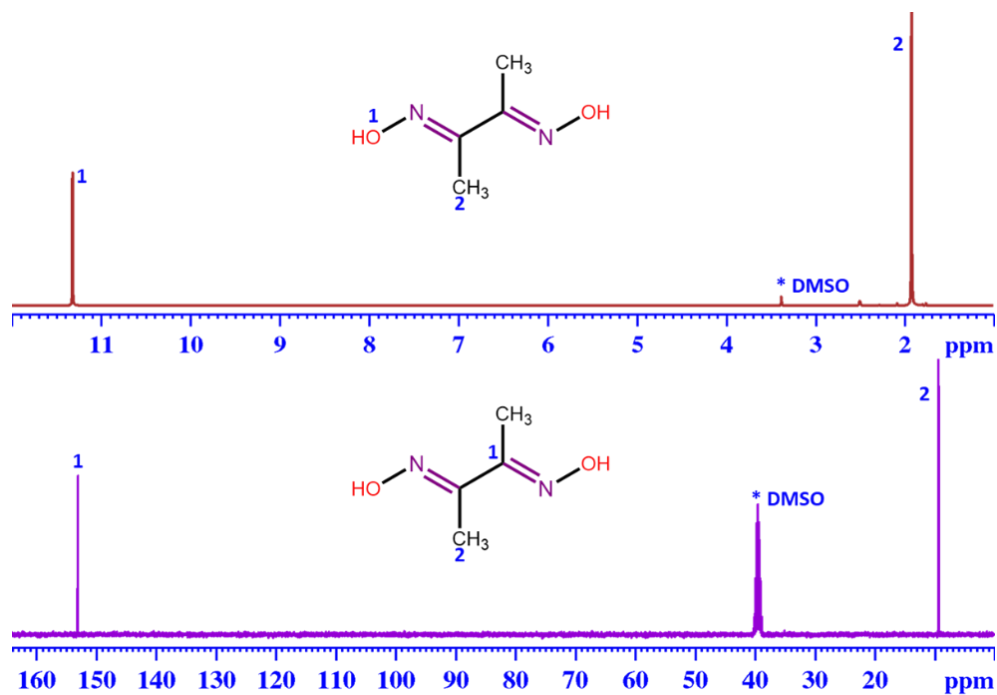

209

210 **Supplementary Fig. 14** |  $^1\text{H}$  and  $^{13}\text{C}$ -NMR spectra of dimethylglyoxime (DMG). The  
211 dimethylglyoxime was purchased from Sigma-Aldrich without any purification.

212

213

214

215

216

217

218

219

220

221

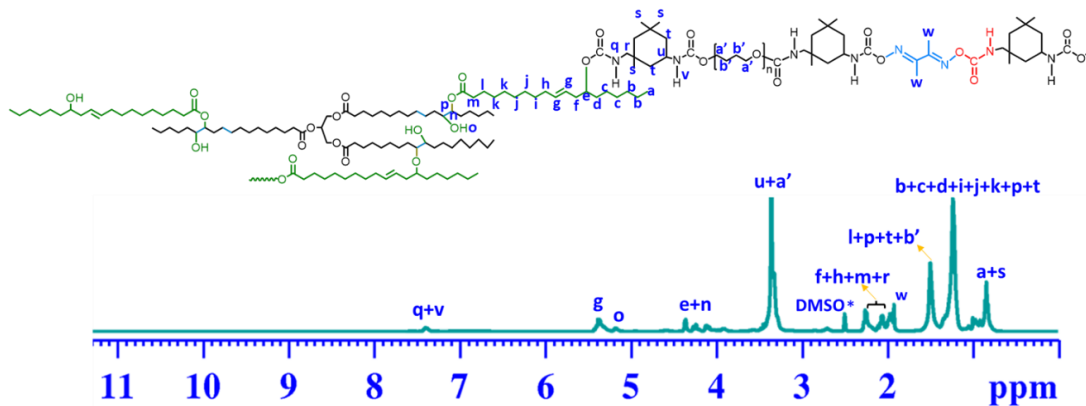

222

223 **Supplementary Fig. 15** |  $^1\text{H-NMR}$  spectra of VegPU.  $^1\text{H-NMR}$  (400 MHz, DMSO, 25 °C)  $\delta$   
 224 (ppm):  $\delta$  7.23-7.38 ( $-\text{C}(\text{O})\text{NH}-$ ),  $\delta$  5.14 ( $-\text{CH}=\text{CH}-$ ),  $\delta$  5.46 ( $-\text{OH}$ ),  $\delta$  4.21-4.35 ( $-\text{O}-\text{CH}-$ ),  $\delta$   
 225 3.32 ( $\text{CO}-\text{NH}-\text{CH}-$ ),  $\delta$  3.28 ( $\text{CO}-\text{O}-\text{CH}_2$ ),  $\delta$  2.17-2.30 ( $-\text{CH}_2-$ ),  $\delta$  2.01 (6H,  $\text{CH}=\text{C}-\text{CH}_3$ ),  $\delta$   
 226 1.52-1.68 ( $-\text{C}-\text{CH}_2-$ ),  $\delta$  1.18-1.50 ( $-\text{CH}_2-\text{CH}_2-\text{CH}_3$ ), and  $\delta$  0.81-0.93 ( $\text{CH}_2-\text{CH}_3$ ).

227

228

229

230

231

232

233

234

235

236

237



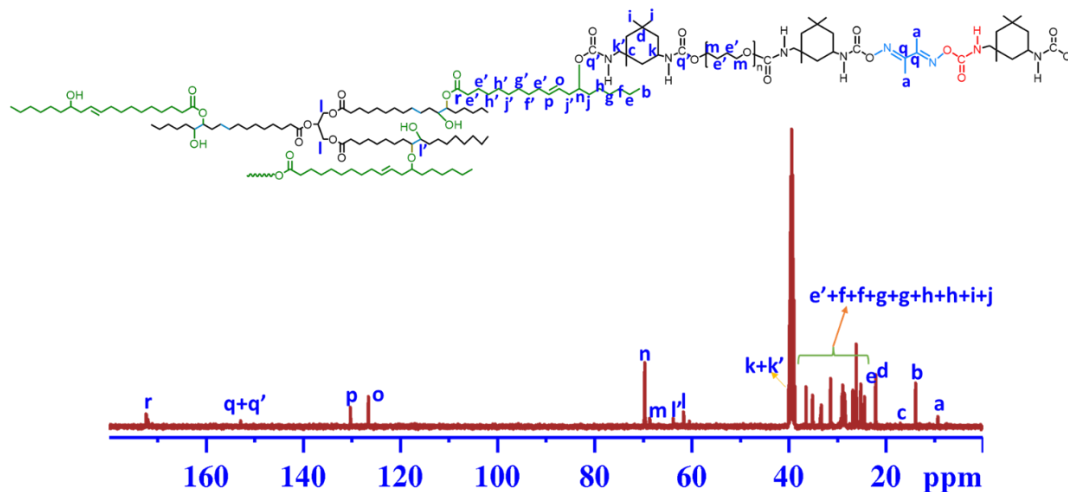

238

239 **Supplementary Fig. 16** | <sup>13</sup>C-NMR spectra of VegPU. <sup>13</sup>C-NMR (400 MHz, DMSO, 25 °C) δ  
 240 (ppm): 173.2 (-CH<sub>2</sub>-CO-O-), 154.1-155.6 (-NH-CO-O-), 131.3 (-C=C), 126.8 (-C=C), 71.6 (CO-  
 241 O-C), 68.2 (CH<sub>2</sub>-O-), 61.8-64.4 (HO-C), 40.9-42.1 (NH-C), 8.3-38.4 (CH<sub>3</sub>-CH<sub>2</sub> and CO-CH<sub>2</sub>,  
 242 etc).

243

244

245

246

247

248

249

250

251

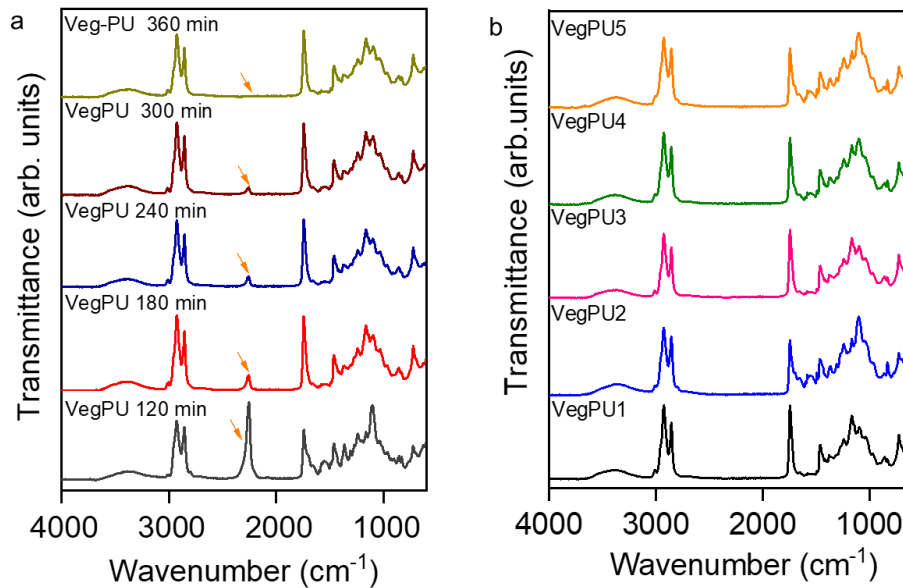

252

253 **Supplementary Fig. 17 | FTIR spectra of a sustainable VegPU prepolymer:** at various time  
 254 intervals (a) and different ratios of oxime (b). The peak at  $2268\text{ cm}^{-1}$  was designated to the NCO  
 255 groups of VegPU at fixed temperature and variable time periods. The strength of the NCO peak at  
 256  $2268\text{ cm}^{-1}$  reduces over time progressively with specific temperature, confirming the reaction  
 257 between the -NCO group of IPDI and the -OH groups of PTMG, SCP, and DMG. After 360  
 258 minutes, there was almost no NCO prepolymer band at  $2268\text{ cm}^{-1}$ , indicating that the NCO and  
 259 the -OH bonds of PTMG, SCP, and DMG had fully reacted and the reaction was complete, with  
 260 no reactants remaining. B) The following characteristic bands were found in the VegPU result:  
 261  $3340\text{-}3356\text{ cm}^{-1}$  (N-H amide stretching),  $3001\text{-}2800\text{ cm}^{-1}$  (symmetric and anti-symmetric aliphatic  
 262 stretching),  $1725\text{ cm}^{-1}$  (C=O carbonyl stretching),  $1453\text{ cm}^{-1}$  (C-H), and  $1539\text{ cm}^{-1}$  (C-  
 263 NH bending). The bands at  $991\text{ cm}^{-1}$  and  $944\text{ cm}^{-1}$  were assigned to the out-of-plane C-H and  
 264 C=C bending vibrations. The peak representing the N-O stretching vibration of oxime appears at  
 265  $975\text{-}988\text{ cm}^{-1}$ .

266

267

268

269

270

271

272

273

274

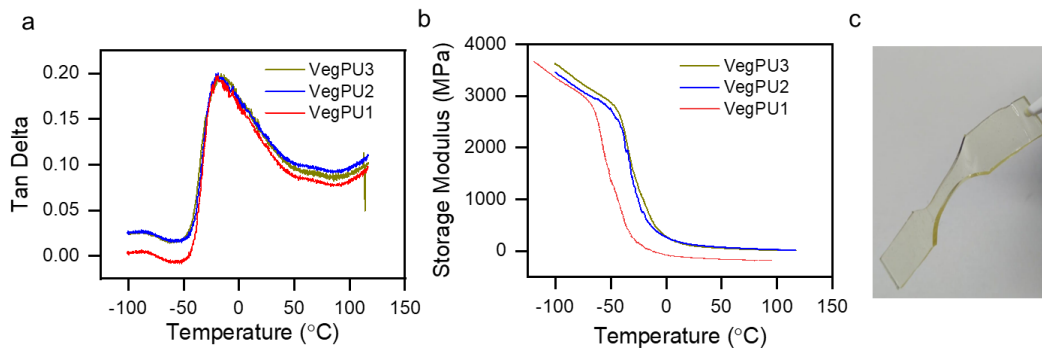

275  
 276 **Supplementary Fig. 18 | The DMA of VegPU.** The loss factor (a) and storage modulus (b) as  
 277 functions of temperature for VegPU films measured by DMA from -100 °C to 120 °C under a room  
 278 temperature, at a heating rate of 3 °C min<sup>-1</sup> and a frequency of 1 Hz. (c) the image of the VegPU  
 279 testing specimen.

280  
 281  
 282  
 283  
 284  
 285  
 286  
 287  
 288  
 289  
 290  
 291  
 292  
 293  
 294  
 295  
 296  
 297

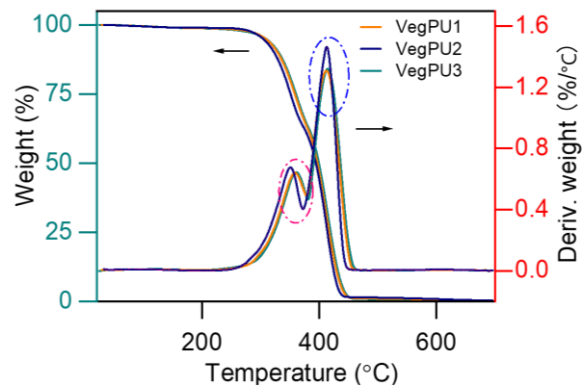

298

299 **Supplementary Fig. 19 | TGA weight loss and derivative curves for the VegPU films.** The first  
 300 degradation of the VegPUs observed at temperatures between 240-350 °C was attributed to the  
 301 decomposition of labile carbamate-oxime groups. The second degradation observed in the  
 302 temperature range from 350-500 °C resulted from chain scission in the sustainable polyols.

303

304

305

306

307

308

309

310

311

312

313

314

315

316

317

318

319

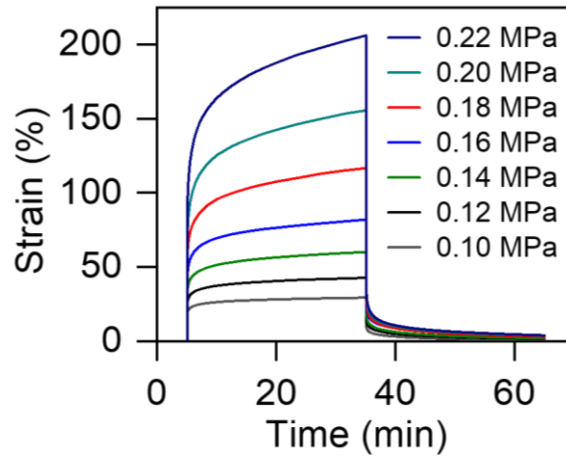

320

321 **Supplementary Fig. 20 | The creep and recovery strain-time curve of VegPU** under different  
 322 applied stress at 25 °C. The creep stress varied from 0.10 to 0.22 MPa. When the stress was  
 323 increased from 0.10 to 0.22 MPa, the strain increased by 28 to 220%. The elastic response of the  
 324 VegPU films causes an instantaneous increment in strain in all VegPU creep curves. At the end of  
 325 the applied load period, viscous flow is observed. When the stress is removed, the strain rapidly  
 326 decreases to the initial elastic response. During the rest period, the polymer makes an attempt to  
 327 recapture its original shape through time-dependent molecular stress relief.

328

329

330

331

332

333

334

335

336

337

338

339

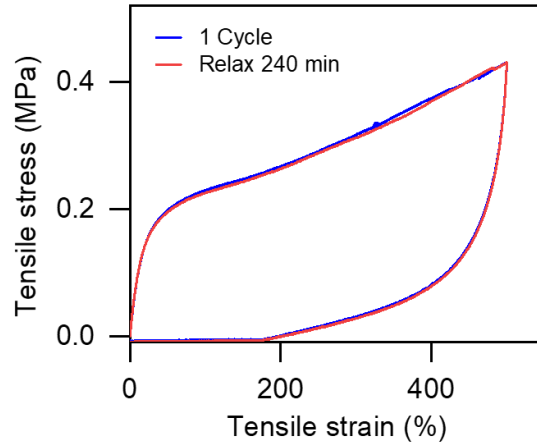

340

341 **Supplementary Fig. 21 | The cyclic tensile (500%) tests of VegPU for the first cycles and after**  
342 **240 min relaxation.** Strain rate: 100 mm/min; width of sample: 14 mm; thickness: 1 mm; length  
343 of gauge: 40 mm.

344

345

346

347

348

349

350

351

352

353

354

355

356

357

358

359

360

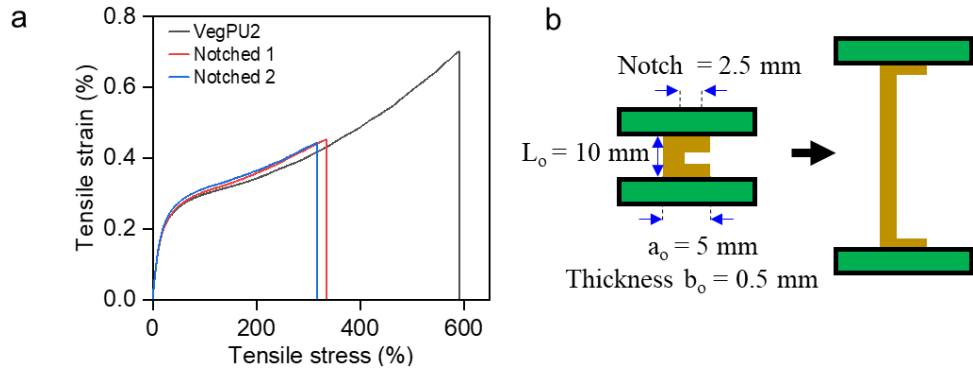

361

362 **Supplementary Fig. 22 | The notch testing for VegPU.** The stress-extension curves of unnotched  
 363 VegPU and notched VegPU film (A); (B) the size of the notched area. 2 mm thickness, 10 mm  
 364 length, and 5 mm width was notched along a single edge at a length of 1 mm, and the film was  
 365 extended at a loading rate of 100 mm/min.

366

367

368

369

370

371

372

373

374

375

376

377

378

379

380

381

382

383

384 **Supplementary Table 1 | The comparison of VegPU with other petrol-based PU elastomers**  
 385 **and sustainable PU elastomers.** HPUA: Hydrophilic poly(urethane-acrylate) elastomer; PDPU:  
 386 polysiloxane-dimethylglyoxime–based polyurethane: poly(urethane-acrylate) elastomer; PU-OOP:  
 387 polyurethane-olive oil polyol; PU-MSO: polyurethane- soybean oil-based polyols; POPU: palm  
 388 oil polyurethane.

| Sample | Sustainable polyols    | Sustainable percentage (%) | Tensile strength (MPa) | Elongation at break (%) | Reference    |
|--------|------------------------|----------------------------|------------------------|-------------------------|--------------|
| HPUA   | None                   | 0                          | 3.69                   | 4954.83                 | <sup>2</sup> |
| PDPU   | None                   | 0                          | 0.9                    | 1800                    | <sup>3</sup> |
| PUA    | None                   | 0                          | 7                      | 5000                    | <sup>4</sup> |
| PU-OOP | Olive oil              | 70.25%                     | 4.7 ±0.4               | 331.5±12.9              | <sup>5</sup> |
| PU-MSO | Soybean oil            | 10.71                      | 11.60±0.24             | 610±20                  | <sup>6</sup> |
| POPU   | Palm oil               | 34.23                      | 1.17±0.4               | 608.52                  | <sup>7</sup> |
| VegPU  | Castor and soybean oil | 75-81%                     | 0.66                   | 797                     | Our work     |

389  
 390  
 391  
 392  
 393  
 394  
 395  
 396  
 397  
 398  
 399  
 400



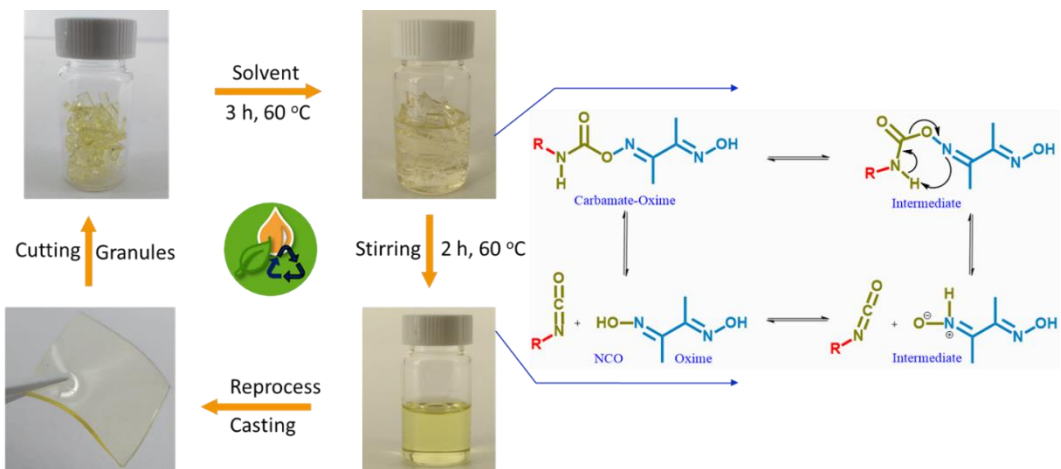

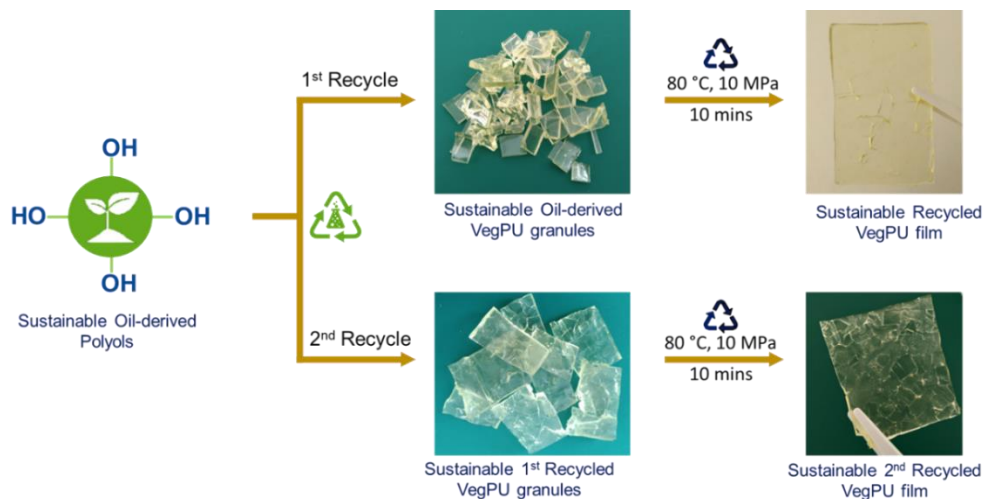

421

422 **Supplementary Fig. 24 | VegPU being recycled through the process of hot-pressing** (Condition:  
 423 80 °C, 10 MPa, 10 mins). The VegPU film was cut into small pieces and hot pressed for 10 minutes  
 424 at 80 °C with a pressure of 10 MPa.

425

426

427

428

429

430

431

432

433

434

435

436

437

438

439

440

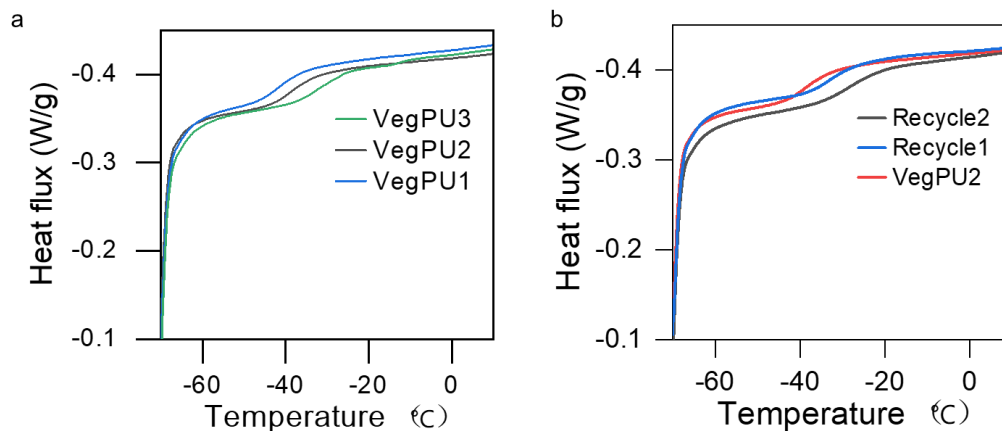

441  
 442 **Supplementary Fig. 25 | DSC thermograms (a) of the different VegPU films and recycling**  
 443 **curves (b) of VegPU2** (Recycle 1: solution casting and Recycle 2: hot-pressing). The DSC  
 444 measurements were carried out at heating rates of 10 °C /min in a nitrogen-free environment. The  
 445 absence of melting or crystallization transitions in the DSC curves indicates that these VegPUs are  
 446 amorphous. Each curve has one Tg, which corresponds to the urethane segments of the obtained  
 447 VegPU. The three VegPUs Tg were remarkably similar, which can be attributed to the urethane  
 448 and hydroxyl functions.

449  
 450  
 451  
 452  
 453  
 454  
 455  
 456  
 457  
 458  
 459  
 460  
 461  
 462

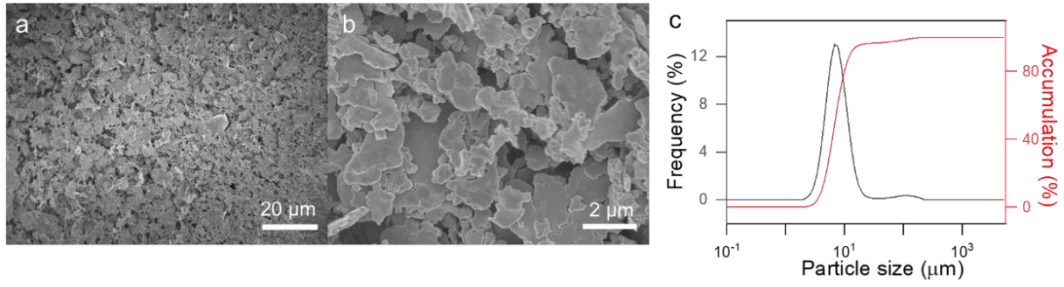

463

464 **Supplementary Fig. 26 | Size characterization of Ag flakes.** SEM ( high-magnification (a) and  
465 low-magnification (b)) and particle size distribution (c) of used Ag flakes.

466

467

468

469

470

471

472

473

474

475

476

477

478

479

480

481

482

483

484

485

486

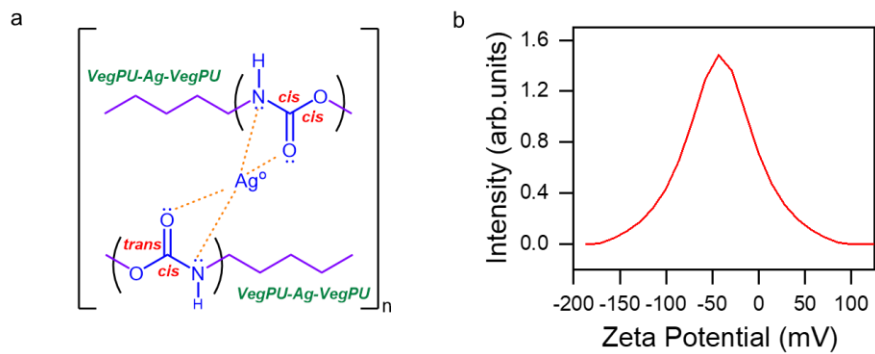

487

488 **Supplementary Fig. 27 | The surface properties of Ag flakes.** Schematics of the bonding  
 489 between Ag flakes coated by fatty acid and VegPU (a) and the zeta potential of Ag flakes in the  
 490 VegPU resin (b).

491

492

493

494

495

496

497

498

499

500

501

502

503

504

505

506

507

508

509

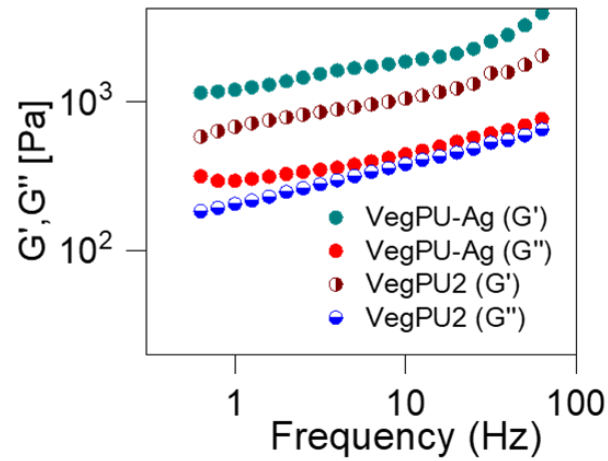

510

511 **Supplementary Fig. 28 | The rheology of VegPU and VegPU/Ag.** The dependence of the storage  
512 modulus ( $G'$ ) and lost modulus ( $G''$ ) on angular frequency for VegPU resin and VegPU/Ag flakes  
513 ink.

514

515

516

517

518

519

520

521

522

523

524

525

526

527

528

529

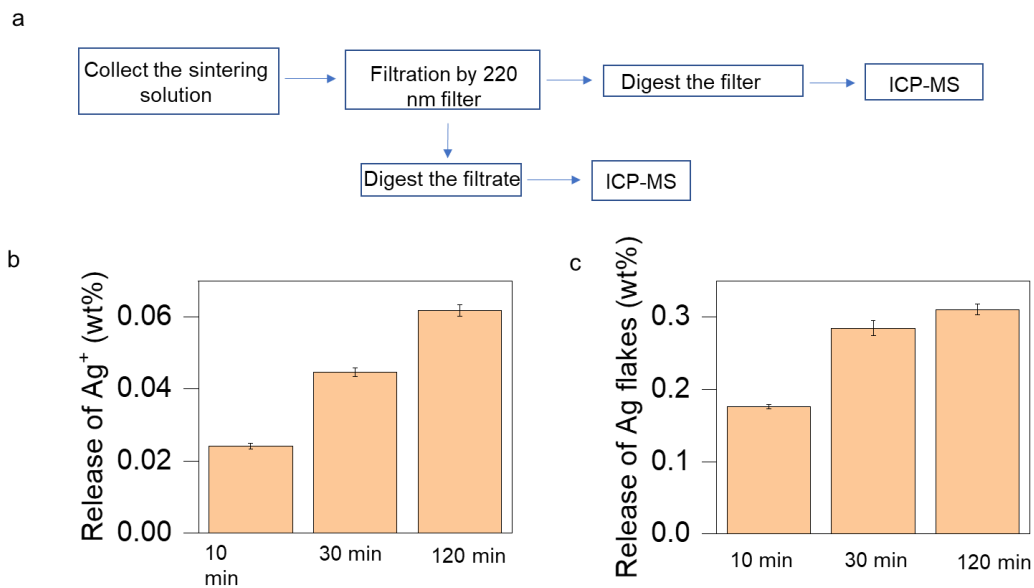

530

531 **Supplementary Fig. 29 | Release of Ag flakes and Ag<sup>+</sup> during the sintering solution curing**  
 532 **process:** (a) the process of collecting Ag flakes and Ag<sup>+</sup>; The release of Ag<sup>+</sup>(b) and Ag flakes (c)  
 533 upon soaking duration. Error bar: n=3.

534

535

536

537

538

539

540

541

542

543

544

545

546

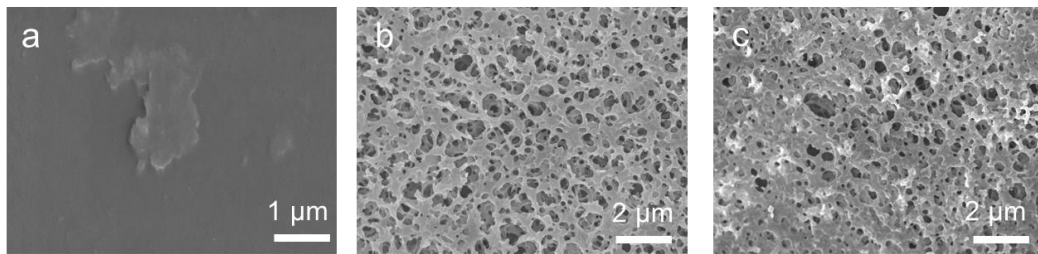

547

548 **Supplementary Fig. 30 | The morphology of VegPU film treated by different methods.** (a-c)  
549 The SEM images of VegPU resin after being cured by 80 °C heat, DI water, and sintering solution,  
550 respectively.

551

552

553

554

555

556

557

558

559

560

561

562

563

564

565

566

567

568

569



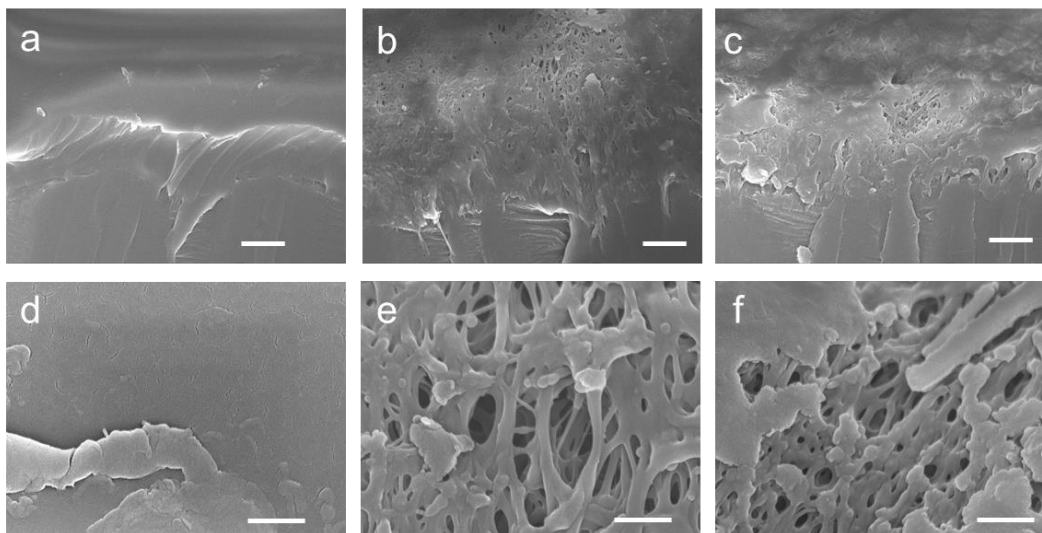

570

571 **Supplementary Fig. 31 | Cross-sectional SEM images of VegPU treated by different methods.**  
572 (a-c) The cross-sectional SEM images of VegPU resin after cured by 80 °C heat, DI water, and  
573 sintering solution, respectively. (d-f) The corresponding SEM images with a higher magnification.  
574 Scale bar in (a-c): 5  $\mu\text{m}$  and in (d-f) 1  $\mu\text{m}$ .

575

576

577

578

579

580

581

582

583

584

585

586

587

588

589

590

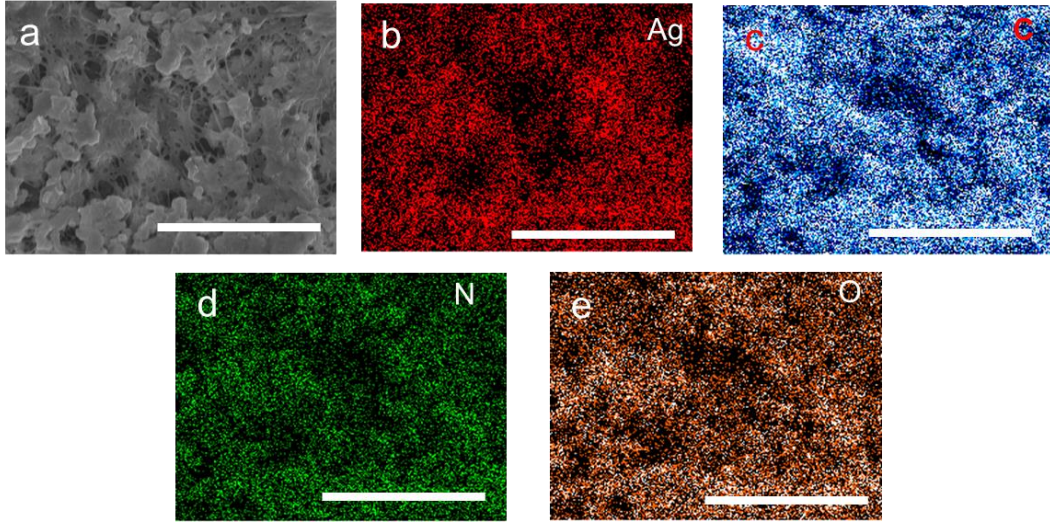

591

592 **Supplementary Fig. 32 | EDX images of VegPU/Ag.** (a) SEM image of the sintering solution-  
593 cured electrode and corresponding EDX images showing Ag (b), C (c), N (d), and O (e) elements.  
594 Scale bar: 6  $\mu\text{m}$ .

595

596

597

598

599

600

601

602

603

604

605

606

607

608

609

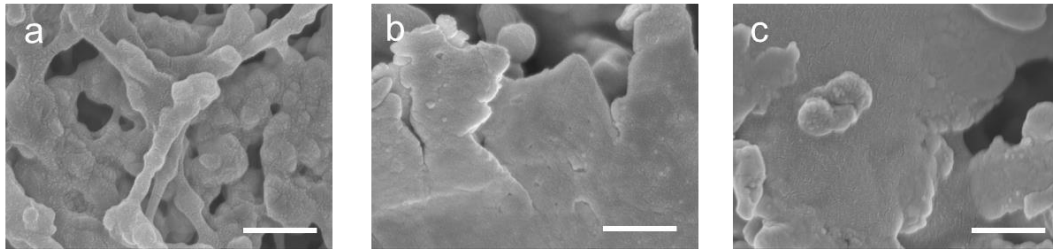

610

611 **Supplementary Fig. 33 | The morphology of VegPU/Ag film treated by different methods.** (a-  
612 c) The high-resolution SEM images of sintering solution-, DI water- and heat-cured VegPU/Ag  
613 electrodes, respectively. Scale bar: 500 nm.

614

615

616

617

618

619

620

621

622

623

624

625

626

627

628

629

630

631

632

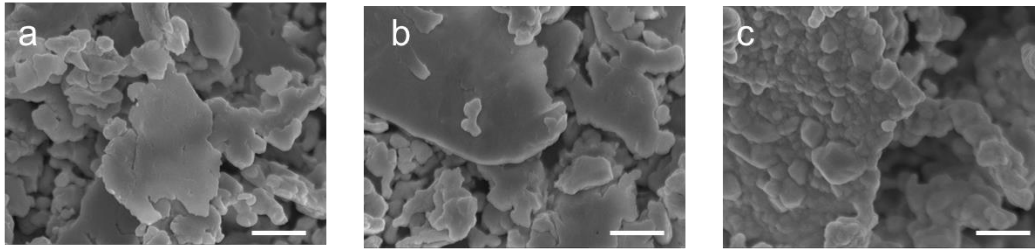

633

634 **Supplementary Fig. 34 | The morphology of Ag flakes treated by different methods.** (a-c) The  
635 SEM images of Ag flakes, DI water, and sintering solution-treated Ag flakes, respectively. Scale  
636 bar: 1  $\mu\text{m}$ .

637

638

639

640

641

642

643

644

645

646

647

648

649

650

651

652

653

654

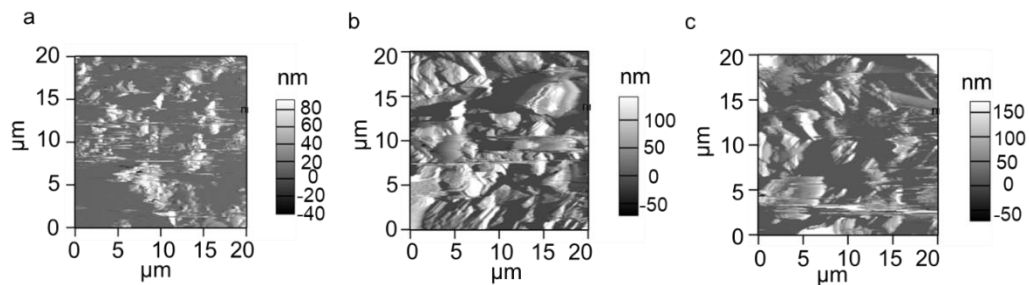

655

656 **Supplementary Fig. 35 | C-AFM topography images of VegPU/Ag electrodes cured by heat**  
657 **curing (a) sintering solution (b) and water (c).**

658

659

660

661

662

663

664

665

666

667

668

669

670

671

672

673

674

675

676

677

678

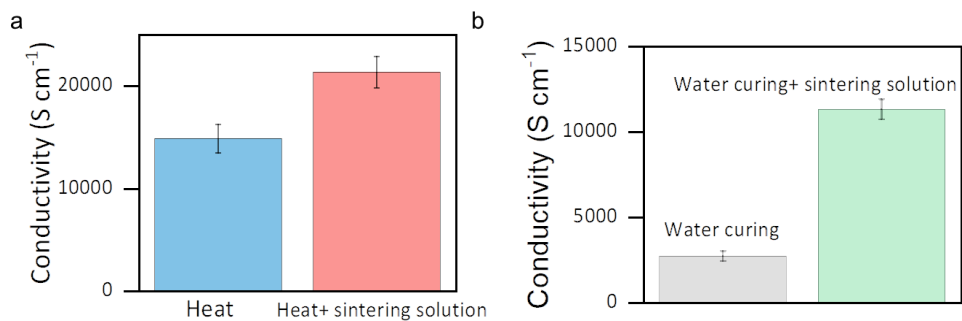

679

680 **Supplementary Fig. 36 | The effect of sintering solution treatment on the conductivity of the**  
681 **electrodes cured by heat and water.** The heat-treated (a) and DI water-treated (b) electrodes were  
682 retreated by the sintering solution. Error bar: n=3.

683

684

685

686

687

688

689

690

691

692

693

694

695

696

697

698

699

700

701

702

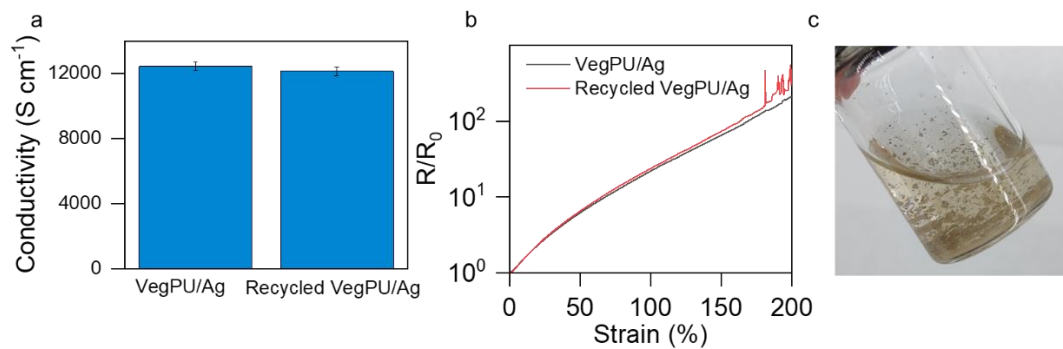

703

704 **Supplementary Fig. 37 | The recycling of the VegPU/Ag electrode.** The conductivity (a) and  
705 resistance changes upon stretching (b) of recycled VegPU-based conductor. (c) The photo image  
706 of collected Ag flakes dispersed in the DMF solvent. Error bar: n=3.

707

708

709

710

711

712

713

714

715

716

717

718

719

720

721

722

723

724

725

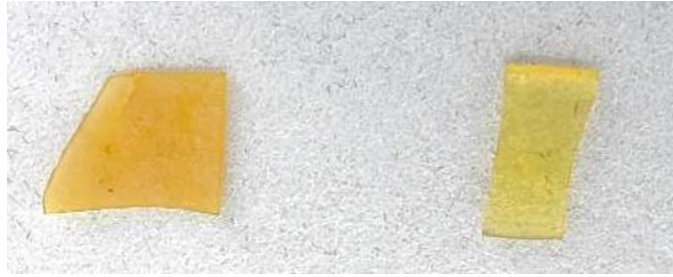

726

727 **Supplementary Fig. 38 | The degradation of VegPU film.** The photo images of VegPU after  
728 soaking in PBS buffer solutions with (left) and without (right) the presence of lipase enzyme.

729

730

731

732

733

734

735

736

737

738

739

740

741

742

743

744

745

746

747

748

749

750



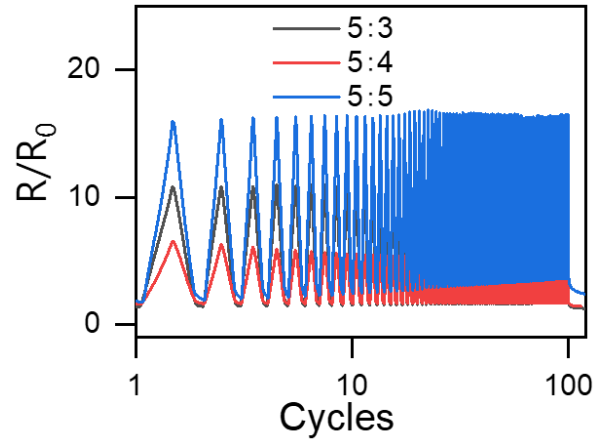

751

752 **Supplementary Fig. 39 | The resistance changes of VegPU during cyclic stretching with**  
753 **different ratios of Ag and VegPU.** The stretching rate is 60 mm/min. VegPU electrodes were  
754 stretched to 50% extension and then released at the same rate.

755

756

757

758

759

760

761

762

763

764

765

766

767

768

769

770

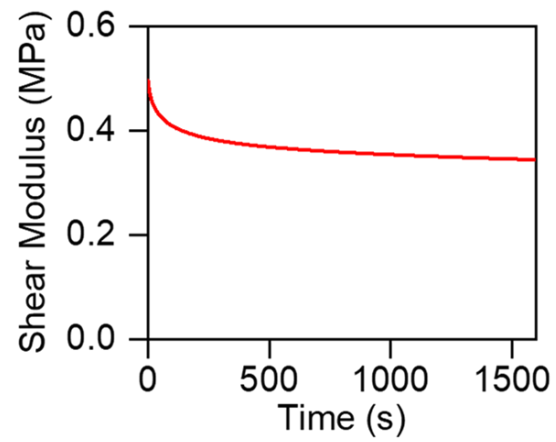

771

772 **Supplementary Fig. 40 | The stress relaxation of VegPU film.** The test was performed at the  
773 ambient temperature (20 °C).

774

775

776

777

778

779

780

781

782

783

784

785

786

787

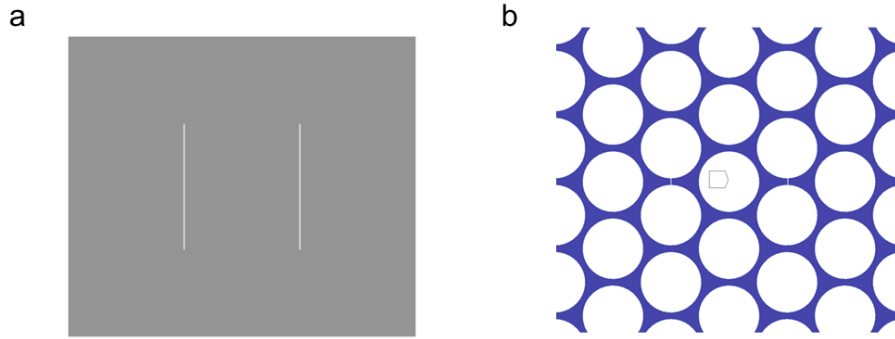

788

789 **Supplementary Fig. 41 | The pre-cut cracks in the dense (a) and porous VegPU film (b).** The  
790 cracks in two films with a same length.

791

792

793

794

795

796

797

798

799

800

801

802

803

804

805

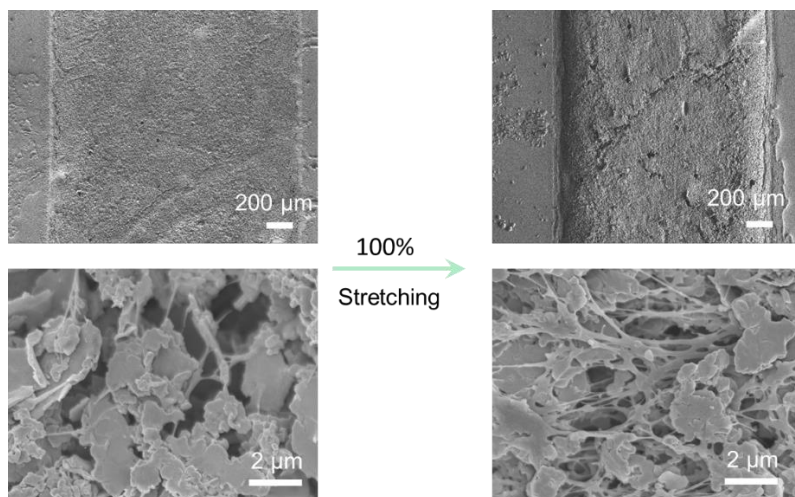

806

807 **Supplementary Fig. 42 | SEM images of the water-treated electrode with the presence 100%**  
808 **of stretching.** Under 100% strain, there are no macro cracks on the water-treated electrode.

809

810

811

812

813

814

815

816

817

818

819

820

821

822

823

824

825

826

827

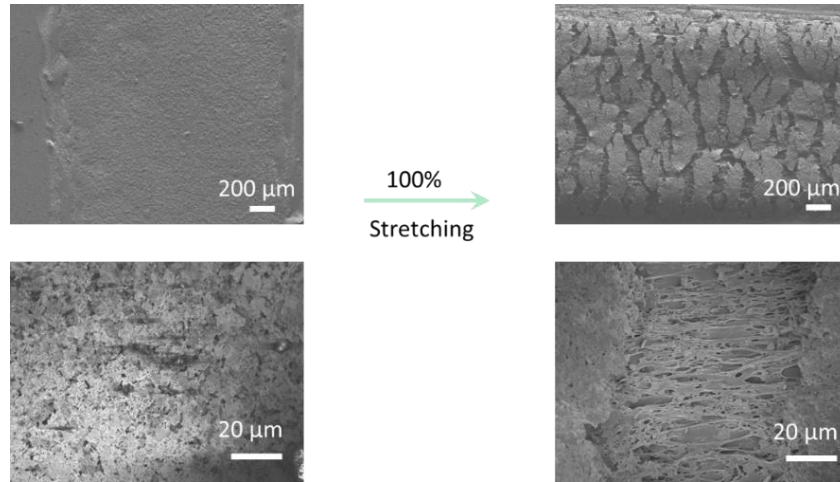

828

829 **Supplementary Fig. 43 | SEM images of the heat-treated electrode with the presence of**  
830 **stretching.** The stretching level is 100%. The printed electrode was adhered on a sample stage.

831

832

833

834

835

836

837

838

839

840

841

842

843

844

845

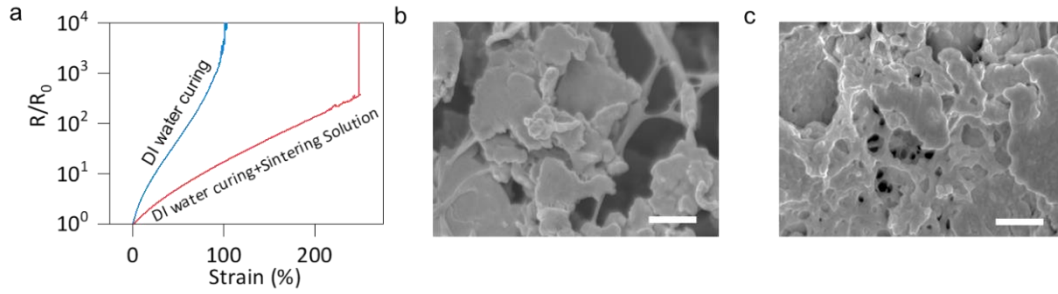

846

847 **Supplementary Fig. 44 | The effect of sintering solution treatment on the DI water-cured**  
848 **electrode.** The resistance variation upon strain (a) and SEM images of VegPU/Ag electrodes cured  
849 by DI water without (b) and with (c) subsequent sintering solution, scale bar: 1  $\mu\text{m}$ .

850

851

852

853

854

855

856

857

858

859

860

861

862

863

864

865

866

867

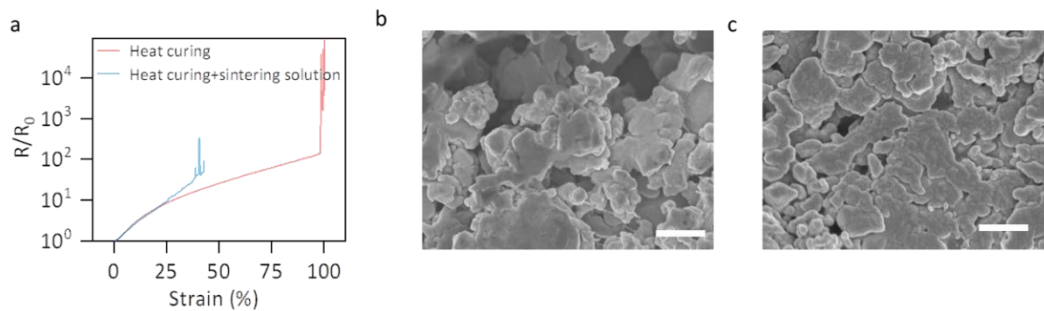

868

869 **Supplementary Fig. 45 | The effect of sintering solution treatment on the heat-treated**  
870 **electrode.** The strain-resistance change curve (a) and SEM images of the heat-cured VegPU/Ag  
871 electrode before (b) and after (c) the retreatment by sintering solution, scale bar: 1  $\mu\text{m}$ .

872

873

874

875

876

877

878

879

880

881

882

883

884

885

886

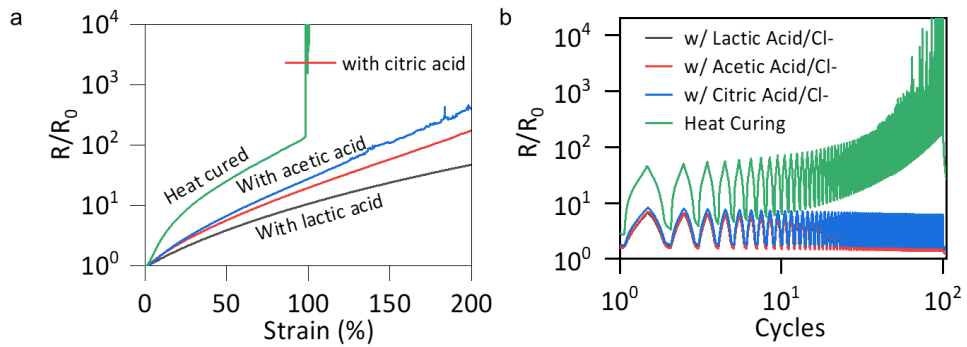

887

888 **Supplementary Fig. 46 | The strain-resistance change (a) and cycling stretching (b) curves of**  
 889 **VegPU/Ag electrodes** cured by different sustainable sintering solutions (lactic acid/Cl<sup>-</sup>, acetic  
 890 acid/Cl<sup>-</sup> and citric acid/Cl<sup>-</sup>).

891

892

893

894

895

896

897

898

899

900

901

902

903

904

905

906

907

908

909

910



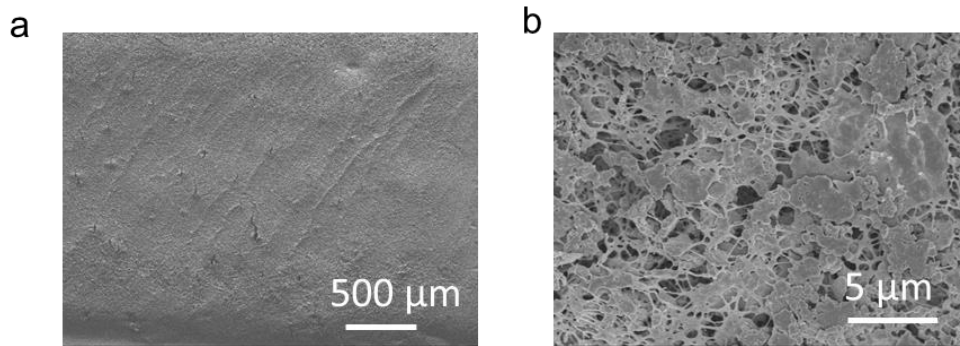

911

912 **Supplementary Fig. 47 | The SEM images of sintering solution-treated electrode after 1000**  
913 **cycles of 50% stretching: (a) Low magnification and (b) high magnification.**

914

915

916

917

918

919

920

921

922

923

924

925

926

927

928

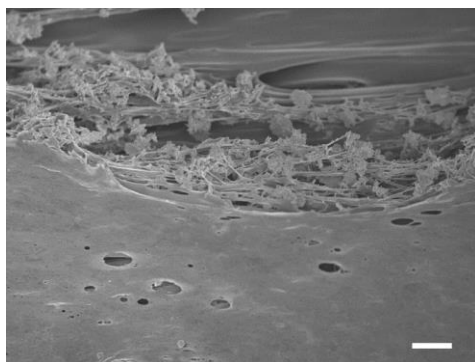

929

930 **Supplementary Fig. 48 | The SEM images of encapsulated sintering solution-treated**  
931 **VegPU/Ag electrode.** The encapsulation material was VegPU and the SEM image was taken  
932 under 50% strain, scale bar: 10  $\mu\text{m}$ .

933

934

935

936

937

938

939

940

941

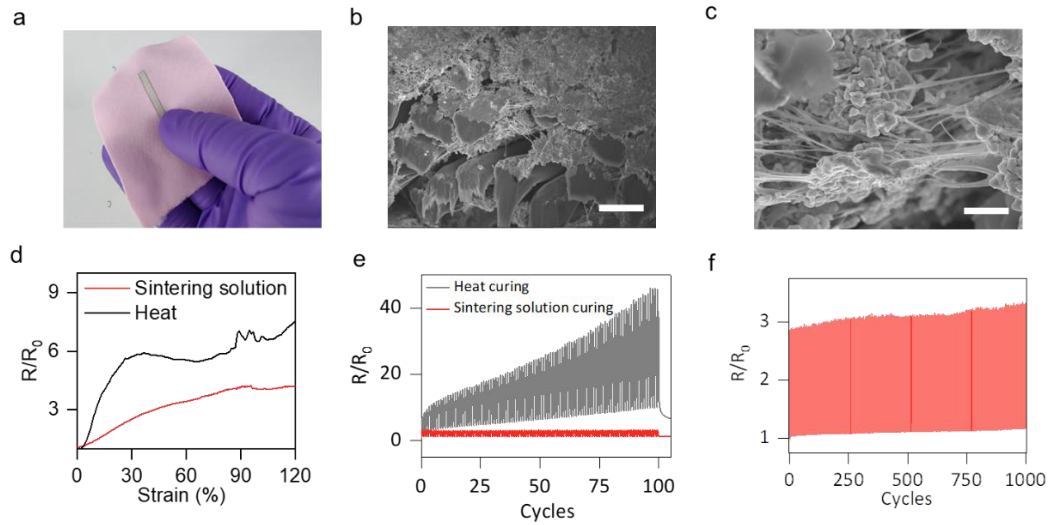

942

943 **Supplementary Fig. 49 | The performance of VegPU/Ag printed on a textile substrate.** The  
 944 photo image (a), SEM images (b and c), strain-resistance change curve (d), and resistance change  
 945 during 50% cycling for 100 cycles (e) and 1000 cycles (f) of the sustainable VegPU/Ag electrode  
 946 printed on textile. Scale bar: 20  $\mu\text{m}$ .

947

948

949

950

951

952

953

954

955

956

957

958

959

960

961

962

963 **Supplementary Table 2 | The performance comparison of VegPU/Ag conductors with**  
 964 **reported conductors.**

| Materials                     | structure | Process           | Conductivity (S cm <sup>-1</sup> )      | Stretchability                      | Cyclic degradation | Test conditions                     | number   |
|-------------------------------|-----------|-------------------|-----------------------------------------|-------------------------------------|--------------------|-------------------------------------|----------|
| Ag flakes/ fluorine rubber    | film      | Screen printing   | 6168                                    | 400%                                | 500                | 50% 100 cycles                      | 8        |
| Ag flakes/ Polyester          | film      | Screen printing   | 7500                                    | 170%                                | 25                 | 50% 100 cycles                      | 9        |
| Ag flakes/PDMS                | film      | Screen printing   | 10604                                   | 119%                                | 50%<br>3.5         | 30% 1000 cycles<br>80% 1000 cycles  | 10       |
| Ag flakes/TPU                 | Film      | Direct writing    | 10000                                   | 240%                                | 3.5                | 5% 1000 cycles                      | 11       |
| Ag flakes/PDMS-MPU-IU         | film      | Transfer printing | 632                                     | 3500%                               | 3                  | 50% 1000                            | 12       |
| Ag flakes/ECO-flex            | film      | Screen printing   | 2400                                    | 500%                                | 0.1                | 50% 1000 speed 4.4 mm/min           | 13       |
| Ag flakes-Ag coated PDMS/PDMS | film      | Stencil printing  | 1190                                    | 125%                                | 90                 | 50% 1000 cycles                     | 14       |
| Ag flakes/4-arm PEG/PANI/PTA  | film      | Stencil printing  | 10800 (4-8 order low before stretching) | 1000%                               | n                  | 1000% 1000 cycles                   | 15       |
| Ag flakes/PCL/Enzyme          | film      | 3D printing       | 210                                     | 80%                                 | 0.875              | 15% 1000 cycles                     | 16       |
| VegPU/Ag flakes               | film      | Stencil printing  | 12833                                   | 350%                                | 0.245<br>0.333     | 50% 1000 cycles<br>100% 1000 cycles | Our work |
|                               | Textile   | Stencil printing  |                                         | 125% (limited by textile substrate) | 0.182              | 50% 1000 cycles                     |          |

965

966

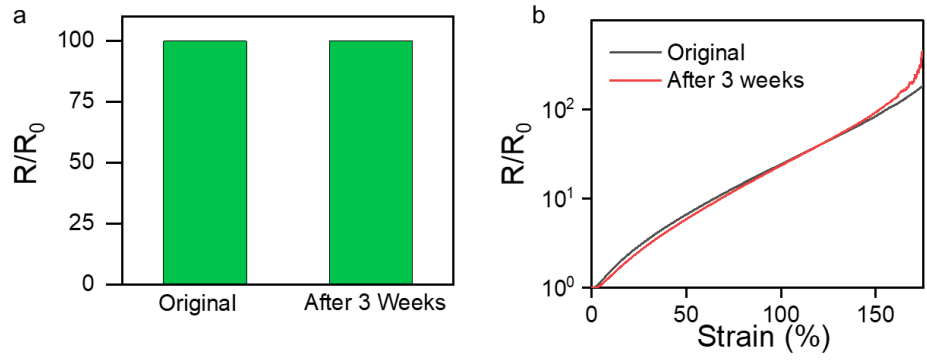

967

968 **Supplementary Fig. 50 | The resistance (a) and stretchability (b) of VegPU/Ag after 3 weeks.**

969 The VegPU/Ag electrodes without any encapsulation was stored at ambient temperature (20 °C).

970

971

972

973

974

975

976

977

978

979

980

981

982

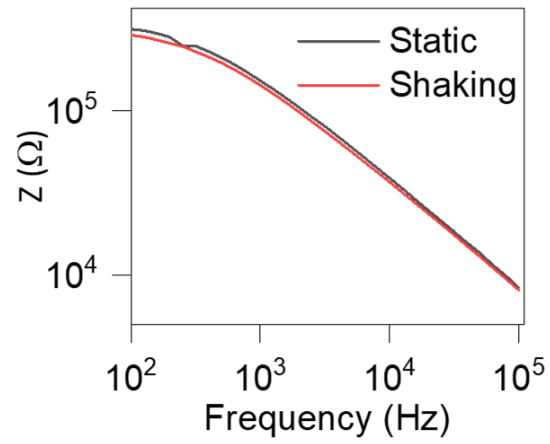

983

984 **Supplementary Fig. 51 | Bode impedance curves of tomato during shaking.** The voltage is 0.2  
985 V with frequencies from 100 Hz to 100000 Hz.

986

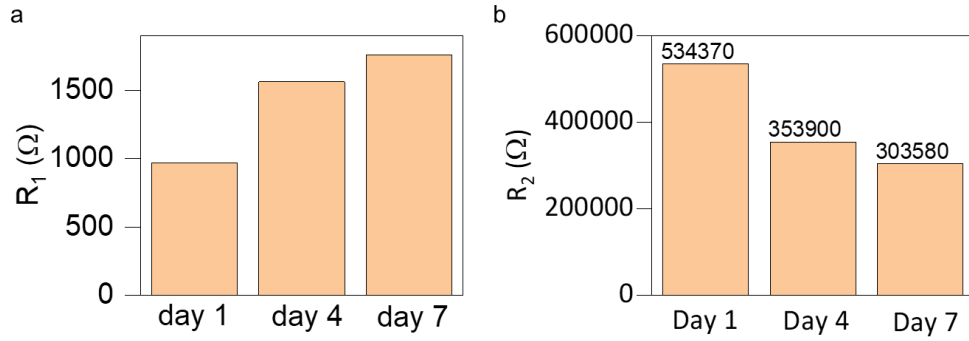

987

988 **Supplementary Fig. 52 | The change of  $R_1$  (a) and  $R_2$  (b) during one-week storage.** The intra-  
989 and extra-cellular fluids are modeled by  $R_1$  and  $R_2$ . The tomato was stored at ambient temperature  
990 for 7 days.

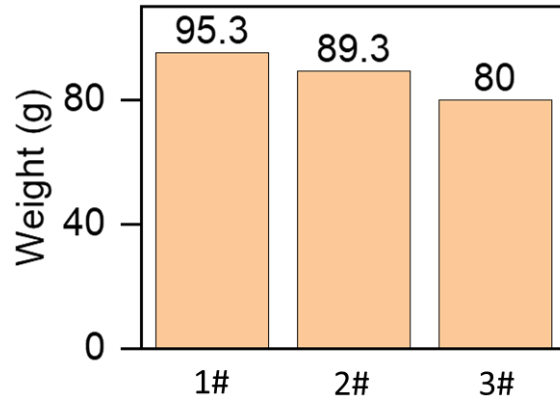

991

992 **Supplementary Fig. 53 | The weight of three targeted tomatoes.** The weight of three tomatoes  
993 was measured by a balance (ME 204, Mettler Toledo).

994



a

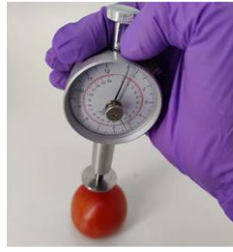

Firmness

b

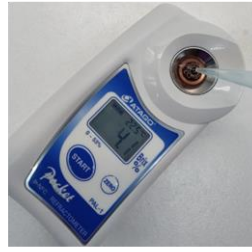

Soluble content

995

996 **Supplementary Fig. 54 | The photo images of firmness (a) and soluble content test (b).** The  
997 firmness of the selected tomato was tested by a fruit hardness tester (GY-3, Jingcheng Instrument),  
998 while the soluble content of the tomato juice was measured by a refractometer (PAL-1, ATAGO).

999

1000

1001

1002

1003

1004

1005

1006

1007

1008

1009

1010

1011

1012

1013

1014

1015

1016

1017

1018 **Supplementary References:**

- 1019 1. Ma, R. & Tsukruk, V. V. Serigraphy-Guided Reduction of Graphene Oxide Biopapers for  
1020 Wearable Sensory Electronics. *Advanced Functional Materials* **27**, 1604802 (2017).
- 1021 2. Lv, J. *et al.* Printable elastomeric electrodes with sweat-enhanced conductivity for wearables.  
1022 *Science Advances* (2021) doi:10.1126/sciadv.abg8433.
- 1023 3. Xiong, J., Thangavel, G., Wang, J., Zhou, X. & Lee, P. S. Self-healable sticky porous  
1024 elastomer for gas-solid interacted power generation. *Sci. Adv.* **6**, eabb4246 (2020).
- 1025 4. Parida, K. *et al.* Extremely stretchable and self-healing conductor based on thermoplastic  
1026 elastomer for all-three-dimensional printed triboelectric nanogenerator. *Nat. Commun.* **10**,  
1027 2158 (2019).
- 1028 5. Shen, Y. *et al.* Synthesis and characterization of vegetable oil based polyurethanes with  
1029 tunable thermomechanical performance. *Industrial Crops and Products* **140**, 111711 (2019).
- 1030 6. Alagi, P., Choi, Y. J., Seog, J. & Hong, S. C. Efficient and quantitative chemical  
1031 transformation of vegetable oils to polyols through a thiol-ene reaction for thermoplastic  
1032 polyurethanes. *Industrial Crops and Products* **87**, 78–88 (2016).
- 1033 7. Zeng, Y. *et al.* Highly Stretchable Fatty Acid Chain-Dangled Thermoplastic Polyurethane  
1034 Elastomers Enabled by H-Bonds and Molecular Chain Entanglements. *ACS Sustainable*  
1035 *Chem. Eng.* **10**, 11524–11532 (2022).
- 1036 8. Matsuhisa, N. *et al.* Printable elastic conductors by in situ formation of silver nanoparticles  
1037 from silver flakes. *Nat. Mater.* **16**, 834–840 (2017).
- 1038 9. Nam, H. J., Kang, S. Y., Park, J. Y. & Choa, S.-H. Intense pulse light sintering of an Ag  
1039 microparticle-based, highly stretchable, and conductive electrode. *Microelectronic*  
1040 *Engineering* **215**, 111012 (2019).

- 1041 10. Guo, W. *et al.* Matrix-Independent Highly Conductive Composites for Electrodes and  
1042 Interconnects in Stretchable Electronics. *ACS Appl. Mater. Interfaces* **11**, 8567–8575 (2019).
- 1043 11. Valentine, A. D. *et al.* Hybrid 3D Printing of Soft Electronics. *Advanced Materials* **29**,  
1044 1703817 (2017).
- 1045 12. Kim, S. H. *et al.* An Ultrastretchable and Self-Healable Nanocomposite Conductor Enabled  
1046 by Autonomously Percolative Electrical Pathways. *ACS Nano* **13**, 6531–6539 (2019).
- 1047 13. Oh, Y. *et al.* Selective photonic sintering of Ag flakes embedded in silicone elastomers to  
1048 fabricate stretchable conductors. *J. Mater. Chem. C* **5**, 11733–11740 (2017).
- 1049 14. Pan, C. *et al.* Silver-Coated Poly(dimethylsiloxane) Beads for Soft, Stretchable, and  
1050 Thermally Stable Conductive Elastomer Composites. *ACS Appl. Mater. Interfaces* **11**,  
1051 42561–42570 (2019).
- 1052 15. Wang, T., Liu, Q., Liu, H., Xu, B. & Xu, H. Printable and Highly Stretchable Viscoelastic  
1053 Conductors with Kinematically Reconstructed Conductive Pathways. *Advanced Materials*  
1054 **34**, 2202418 (2022).
- 1055 16. Kwon, J. *et al.* Conductive Ink with Circular Life Cycle for Printed Electronics. *Advanced*  
1056 *Materials* **34**, 2202177 (2022).
- 1057
