# Supplementary material for: Printed sustainable elastomeric conductor for soft electronics
Source: PubMed Central journal article supplement (PMC10628110; doi:10.1038/s41467-023-42838-7), 2023-11-06
Supplement: 41467_2023_42838_MOESM4_ESM.pdf [file 41467_2023_42838_MOESM4_ESM.pdf]

## **Description of additional supplementary files**

**Supplementary Movie 1** | The demonstration of sintering solution treatment.

**Supplementary Movie 2** | Tomato impedance sensing by a soft gripper.
